# Supplementary material for: Silica and zirconia supported tungsten, molybdenum and gallium oxide catalysts for the synthesis of furfural
Source: Royal Society of Chemistry journal article supplement (doi:10.1039/c4cy00530a), 2014-06-16
Supplement: c4cy00530a1.pdf [file c4cy00530a1.pdf]

**Electronic Supplementary Information**

Silica and zirconia supported tungsten, molybdenum and gallium oxide  
catalysts for the synthesis of furfural

Prasenjit Bhaumik, Tanushree Kane and Paresh Laxmikant Dhepe\*

Catalysis & Inorganic Chemistry Division, CSIR-National Chemical Laboratory, Dr. Homi  
Bhabha Road, Pune 411008, India

## Materials

The chemicals used in this work were listed here. Softwood derived hemicellulose (Xylan, Aldrich Chemicals, USA, xylose  $\geq 70\%$ , glucose 15%, arabinose 10%), xylose (LOBA Chemicals, India, 99.5%), arabinose (s. d. fine, India, 100%), xylo-oligosaccharide (DP = 2-7, Cascade Analytical Reagents and Biochemicals, USA, 95%), glucose (s. d. fine, India, 100%), fructose (LOBA Chemicals, India, 99%), 5-hydroxymethylfurfural (Aldrich Chemicals, USA,  $>99\%$ ), furfural (LOBA Chemicals, India, 98%), toluene (LOBA Chemicals, India, 99.5%), ethanol (Analytical Reagents, India, 99.9%), ethylene glycol (s. d. fine, India, 99%), HCl (LOBA Chemicals, India, 35%), HNO<sub>3</sub> (LOBA Chemicals, India, 69-72%), ammonia solution (Rankem, India, 25%), fumed silica (Aldrich Chemicals, USA, 99.8%), tetraethyl orthosilicate (TEOS, Aldrich Chemicals, USA, 98%), zirconyl nitrate (LOBA Chemicals, India, 99%), ammonium metatungstate hydrate (AMT, Aldrich Chemicals, USA, 66.5%), ammonium heptamolybdate tetrahydrate (AHM, LOBA Chemicals, India, 98%), gallium nitrate (Acros Organics, 99.99%), and *p*-nitro aniline (Thomas Baker, India, 99%) were purchased and used as received. Zeolite, HMOR (Si/Al = 10) was obtained from Zeolyst International and before use, it was calcined at 823 K in air for 16 h.

## Catalyst synthesis

Various metals were incorporated in either silica (SiO<sub>2</sub>) or zirconia (ZrO<sub>2</sub>) through different synthesis techniques (wet-impregnation and sol-gel method). Metal loading was kept constant at 10 wt% for all the catalysts. Before use all the supports were activated at 423 K under evacuation for 6 h. The synthesis processes are described below.

For the synthesis of catalysts by wet-impregnation (WI) method, as a metal precursor, ammonium metatungstate hydrate (AMT), ammonium heptamolybdate tetrahydrate (AHM), and gallium nitrate salt solutions were used in the synthesis of WO<sub>3</sub>/SiO<sub>2</sub>, MoO<sub>3</sub>/SiO<sub>2</sub>, and Ga<sub>2</sub>O<sub>3</sub>/SiO<sub>2</sub> catalysts, respectively. In a typical synthesis procedure, 1.0 g of SiO<sub>2</sub> support was dispersed uniformly in 8 mL of de-ionized water within 0.5 h. Then requisite amount of metal salt solution (metal concentration = 10 wt% with respect to silica; in 2 mL de-ionized water) was added slowly to the dispersed silica and stirred vigorously for 16 h at *RT*. Now the excess water was removed from the system with rotary evaporator and the solid obtained was dried (first at

333 K for 16 h and then at 383 K for 6 h under evacuation). Finally the materials were calcined in air to obtain supported metal oxide catalysts. The calcination temperatures applied were 823 K for tungsten (2 h) and molybdenum (5 h), and 573 K for gallium (1 h) catalyst. The catalysts prepared by wet-impregnation method are named as  $\text{WO}_3/\text{SiO}_2$  (WI),  $\text{MoO}_3/\text{SiO}_2$  (WI) and  $\text{Ga}_2\text{O}_3/\text{SiO}_2$  (WI).

In sol-gel (SG) synthesis, W, Mo, and Ga oxides were supported on both  $\text{SiO}_2$  and  $\text{ZrO}_2$  based on the processes described in the literature<sup>1-5</sup> with minor modification in the procedure. The detail procedures were described below.

For synthesis of  $\text{WO}_3/\text{SiO}_2$  (SG) catalyst, typically, mixture of 10 mL TEOS and 20 mL deionized water was made homogeneous and hydrolysed at 333 K for 14 h. Resulting ethanol was removed from the system and after thorough water washing and separation silica gel was obtained. Prepared silica gel was made acidic with careful addition of 3.8 M HCl (pH=1-1.5). In another beaker, 0.67 g AMT (calculated amount for 10 wt% W based on theoretical yield of silica) was dissolved in de-ionized water to obtain  $6.5 \times 10^{-3}$  M solution. pH of this solution was maintained at 1-1.5 by addition of 3.8 M HCl at RT and the solution was aged under static condition for 48 h. Now, acidic tungstate gel was mixed slowly with acidic silica gel under vigorous stirring for 1 h. Resulting solution was aged at RT under static condition for 12 h. The gel thus obtained was washed with water and dried (first at 333 K for 16 h and then at 383 K for 6 h under evacuation). Finally light yellow coloured  $\text{WO}_3/\text{SiO}_2$  (SG) was obtained after calcination of material at 823 K for 2 h in the presence of air.

In a typical synthesis of  $\text{MoO}_3/\text{SiO}_2$  (SG), 0.64 g AHM (calculated amount for 10 wt% Mo based on theoretical yield of  $\text{SiO}_2$ ) was dissolved in 40 mL ethylene glycol and solution was stirred for 0.5 h. Then to this solution, 10 mL TEOS was added and resulting mixture was heated at 353 K for 5 h under vigorous stirring. The solution was then diluted with 20 mL of de-ionized water and acidified with 0.5 mL concentrated  $\text{HNO}_3$ . The solution was then kept at 353 K under stirring until it becomes a thick gel. The gel formed was washed with water, dried (first at 333 K for 16 h and then at 383 K for 6 h under evacuation), and finally calcined at 823 K for 5 h in air to obtain powdered  $\text{MoO}_3/\text{SiO}_2$  (SG).

Typically for the synthesis of Ga<sub>2</sub>O<sub>3</sub>/SiO<sub>2</sub> (SG), to the solution of 1.25 g gallium nitrate (calculated amount for 10 wt% Ga based on theoretical yield of SiO<sub>2</sub>) 21 mL ethanol and 10 mL of TEOS was added and the mixture was stirred for 0.5 h at RT. A thick gel was formed after the slow addition of ammonia solution to the previous mixture. The gel was washed with ethanol, dried (first at 333 K for 16 h and then at 383 K for 6 h under evacuation), and finally calcined at 573 K for 1 h in air to get final catalyst.

In a typical synthesis of ZrO<sub>2</sub>, 5.0 g zirconyl nitrate hydrate was dissolved in 98.27 g distilled water. To it, 5% diluted ammonia solution was added drop by drop with vigorous stirring until pH of solution become 9.1 and stirring was continued for 1 h at 298 K. Then the solid mass was aged for 12 h at *RT* without stirring. The precipitate obtained was washed with water till pH becomes neutral and dried (first at 333 K for 16 h and then at 383 K for 6 h under evacuation). Finally light brown powdered ZrO<sub>2</sub> was obtained after calcination at 773 K for 4 h in presence of air.

For the synthesis of WO<sub>3</sub>/ZrO<sub>2</sub> (SG) catalyst, 1.88 g zirconyl nitrate was dissolved in 30 mL deionized water and pH of this solution was adjusted to 10 with a slow addition of 25% ammonia solution. In another container, aqueous solution of AMT (0.22 g AMT + 7 mL deionized water) was prepared and made alkaline with dropwise addition of 25% ammonia (pH = 10). Now zirconyl nitrate solution was added slowly to alkaline AMT solution and a white gel was formed. The gel was aged at *RT* for 24 h under static condition. The gel obtained was washed with water and dried (first at 333 K for 16 h and then at 383 K for 6 h under evacuation). Finally powdered WO<sub>3</sub>/ZrO<sub>2</sub> (SG) was obtained after calcination at 823 K for 2 h in presence of air.

In a typical synthesis of MoO<sub>3</sub>/ZrO<sub>2</sub> (SG) catalyst, 1.88 g zirconyl nitrate was dissolved in 30 mL deionized water and made homogeneous by stirring for 0.25 h. To it an aqueous solution (7 mL) of calculated amount of AHM (0.21 g; to maintain 10 wt% Mo based on theoretical amount of ZrO<sub>2</sub>) was added and stirred vigorously. 25% ammonia was then added to the system under constant stirring until pH = 10 was reached and the gel formed was aged at *RT* for 12 h under static condition. Later this gel was washed with water, dried (first at 333 K for 16 h and then at 383 K for 6 h under evacuation), and finally calcined at 823 K for 5 h in air to obtain powdered MoO<sub>3</sub>/ZrO<sub>2</sub>.

Typically for the synthesis of Ga<sub>2</sub>O<sub>3</sub>/ZrO<sub>2</sub> (SG) catalyst, 1.88 g zirconyl nitrate was dissolved in 30 mL deionized water and pH of this solution was maintained at 10 with a slow addition of 25% ammonia solution. In another container, aqueous solution of gallium nitrate (0.41 g salt + 7 mL de-ionized water) was prepared and made alkaline with dropwise addition of 25% ammonia (pH = 10). Now zirconyl nitrate solution was added slowly to alkaline salt solution and formation of gel was observed. The gel was aged at *RT* for 24 h under static condition. The gel obtained was washed with water and dried (first at 333 K for 16 h and then at 383 K for 6 h under evacuation). Finally powdered Ga<sub>2</sub>O<sub>3</sub>/ZrO<sub>2</sub> (SG) was obtained after calcination of material at 573 K for 1 h in presence of air.

### **Catalyst characterization techniques**

The synthesized supported metal oxide catalysts were characterized with Thermogravimetry Analysis (TGA-DTG), X-ray Diffraction (XRD), Temperature Programmed Desorption of ammonia (TPD-NH<sub>3</sub>), Inductively Coupled Plasma-Optical Emission Spectroscopy (ICP-OES) and Ultraviolet-Visible (UV-Vis) spectroscopy techniques.

Thermal stability of catalysts was analyzed with Mettler Toledo TGA/SDTA 851 series, USA instrument at a heating rate of 10 K min<sup>-1</sup>. The recording temperature range of graph was set at 298-1273 K.

XRD analysis of samples was carried out with Rigaku Miniflex diffractometer using a Ni-filtered monochromatic Cu K<sub>α</sub> radiation ( $\lambda = 1.54 \text{ \AA}$ ).

Micromeritics AutoChem-2920 instrument equipped with thermal conductivity detector was used for the TPD analysis. Before analysis, all the samples were activated at 873 K in He gas flow. Adsorption of NH<sub>3</sub> gas (10% NH<sub>3</sub> + 90% He) on the catalyst surface was allowed at 323 K for 1 h followed by catalyst surface cleaning with 100% He to remove physisorbed NH<sub>3</sub>. Then the recording was carried out at 10 Kmin<sup>-1</sup> heating rate in the temperature range of 373-873 K for NH<sub>3</sub> desorption.

Elemental analysis was carried out in Spectro Acros ICP-OES instrument installed with winlab software.

UV-Vis spectra were recorded with Jesco V-570 spectrophotometer in the range of 200-600 nm. This analysis also helps in determining Hammett acidity value ( $H_0$ ) of the catalysts. For analysis of solid powdered catalyst, we used the same instrument operated in a wavelength range of 200-600 nm.

### **Catalytic reaction**

For catalytic reaction, softwood hemicellulose (xylan) composed of  $\geq 70\%$  xylose, 10% arabinose and 15% glucose unit was used. Typically, reactions were carried out with 0.3 g hemicelluloses (xylan) or xylose, 0.075 g catalyst and water or water + toluene (1:1 v/v) = 60 mL charged in Parr autoclave. Inert atmosphere in autoclave was ensured with  $N_2$  gas flushing thrice inside the autoclave and finally filled with 0.2 MPa  $N_2$  gas. Then reaction was conducted at desired temperature. After the reaction catalyst was separated from reaction mixture by centrifugation.

### **Analysis of reaction solutions**

Water soluble products were identified and quantified with Agilent 1260 Infinity series HPLC operated with Millipore water as mobile phase ( $0.6 \text{ mL min}^{-1}$  flow rate), combined with  $Pb^{2+}$  column ( $300 \text{ mm} \times 7.8 \text{ mm}$ , oven temperature of 353 K), and refractive index detector (cell temperature of 313 K). Toluene (organic solvent) soluble products were identified and quantified with Varian make gas chromatograph, equipped with HP-5 column ( $50 \text{ m} \times 0.22 \mu\text{m ID}$ ), and flame ionization detector (FID).

### **Calculations**

Detail calculations for the xylose/hemicellulose conversions and product yields were described below.

% conversion of xylose =  $[\{\text{Initial mole of xylose} - \text{mole of xylose remaining (HPLC)}\} / \text{Initial mole of xylose}] \times 100$

% Hemicellulose conversion =  $[(\text{Total solid charged in the reaction} - \text{Solid recovered after reaction}) / (\text{Weight of initial hemicellulose charged in the reactor})] \times 100$

Hemicellulose molecular weight was taken as 132 considering loss of 18 (due to water removal) from xylose/arabinose (molecular weight of 150) during polymerization to form

hemicellulose. So 132 g hemicellulose will form 150 g xylose + arabinose (considering 100% conversion and selectivity).

% yield of xylose + arabinose = [mole of xylose + arabinose (HPLC) / mole of xylose + arabinose (theoretical)] × 100

Molecular weight of furfural is 96. So, 96 g of furfural formation is possible from 150 g xylose + arabinose (considering 100% yield and selectivity).

% yield of furfural = [mole of furfural (GC [org] + HPLC [water]) / mole of furfural (theoretical)] × 100

For the quantification of oligomers, standard containing dimer to heptamer was procured and then calibration curve was drawn.

**Table S1** ICP-OES analysis of metal oxide catalysts prepared with the theoretical loading of 10wt%

| Synthesis technique | Catalyst                                               | Actual metal loading (wt%) |
|---------------------|--------------------------------------------------------|----------------------------|
| Sol-gel             | Fresh WO <sub>3</sub> /SiO <sub>2</sub>                | 9.95                       |
|                     | Spent WO <sub>3</sub> /SiO <sub>2</sub>                | 9.93                       |
|                     | Fresh MoO <sub>3</sub> /SiO <sub>2</sub>               | 9.01                       |
|                     | Spent MoO <sub>3</sub> /SiO <sub>2</sub>               | 9.03                       |
|                     | Fresh Ga <sub>2</sub> O <sub>3</sub> /SiO <sub>2</sub> | 9.36                       |
|                     | Spent Ga <sub>2</sub> O <sub>3</sub> /SiO <sub>2</sub> | 9.30                       |
| Wet-impregnation    | Fresh WO <sub>3</sub> /SiO <sub>2</sub>                | 9.79                       |
|                     | Spent WO <sub>3</sub> /SiO <sub>2</sub>                | 5.32                       |
|                     | Fresh MoO <sub>3</sub> /SiO <sub>2</sub>               | 8.74                       |
|                     | Spent MoO <sub>3</sub> /SiO <sub>2</sub>               | 4.11                       |
|                     | Fresh Ga <sub>2</sub> O <sub>3</sub> /SiO <sub>2</sub> | 9.22                       |
|                     | Spent Ga <sub>2</sub> O <sub>3</sub> /SiO <sub>2</sub> | 6.89                       |



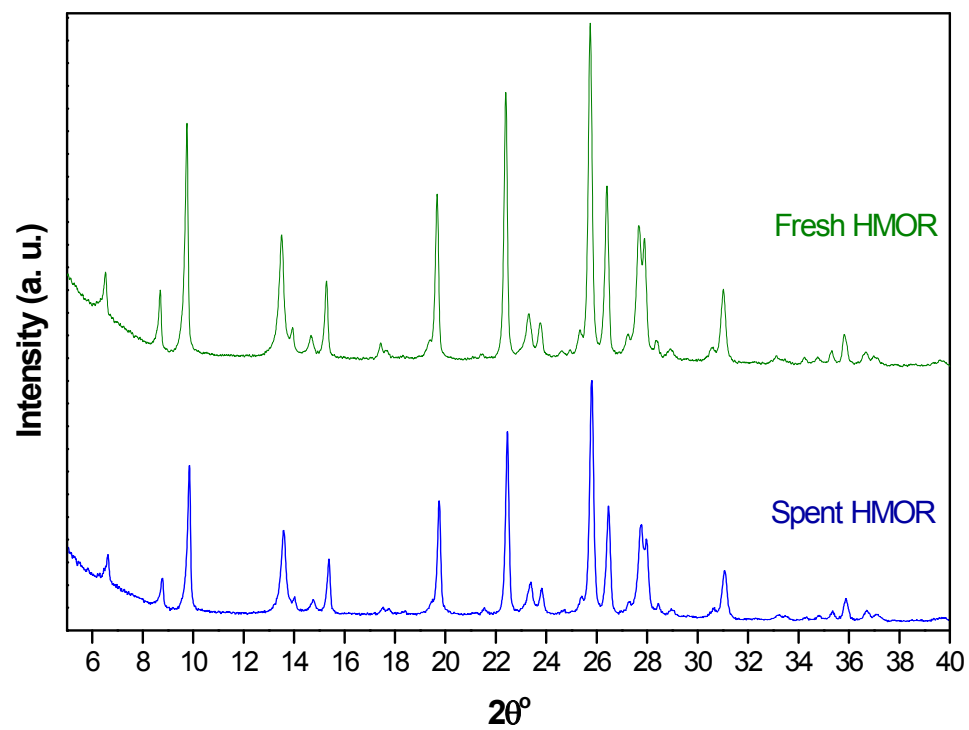

**Fig. S1** XRD patterns for HMOR (Si/Al = 10) catalyst before use (fresh) and after use (spent, after calcination at 823 K, 12 h, in air) in hemicellulose conversion.

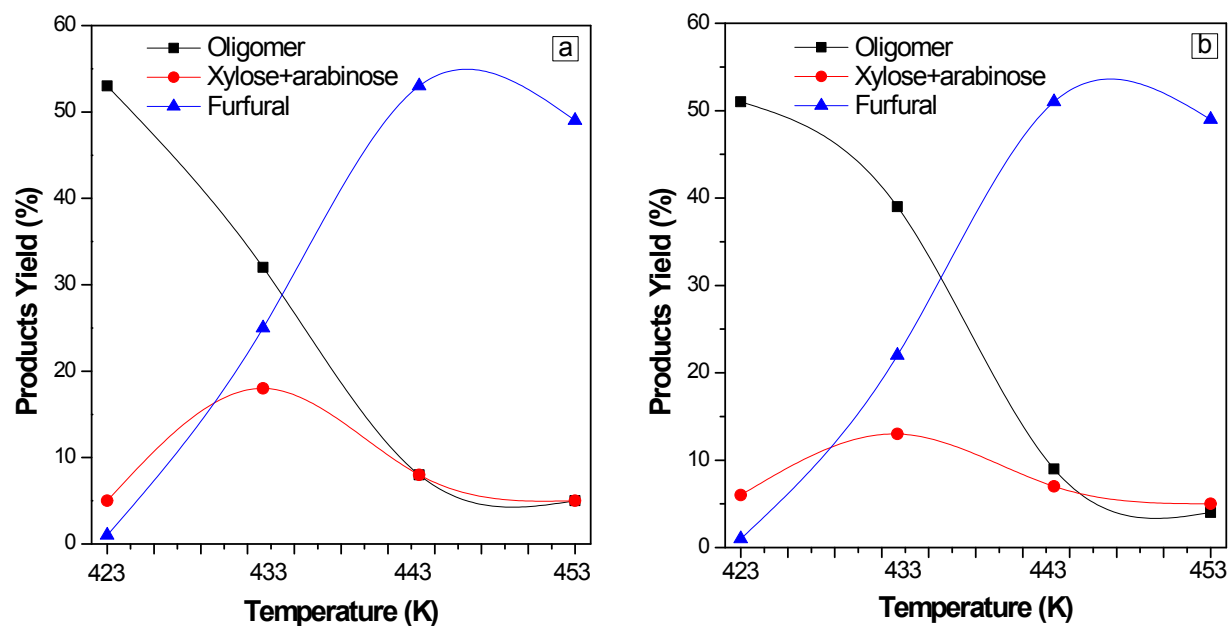

**Fig. S2a, b** Optimization of reaction temperature for one-pot hemicellulose conversion to furfural in presence of sol-gel (SG) synthesized catalysts; a.  $\text{WO}_3/\text{SiO}_2$ , b.  $\text{Ga}_2\text{O}_3/\text{SiO}_2$ . Reaction conditions: hemicellulose (0.3 g), catalyst (0.075 g), water + toluene = 60 mL (1:1 v/v), 8 h.

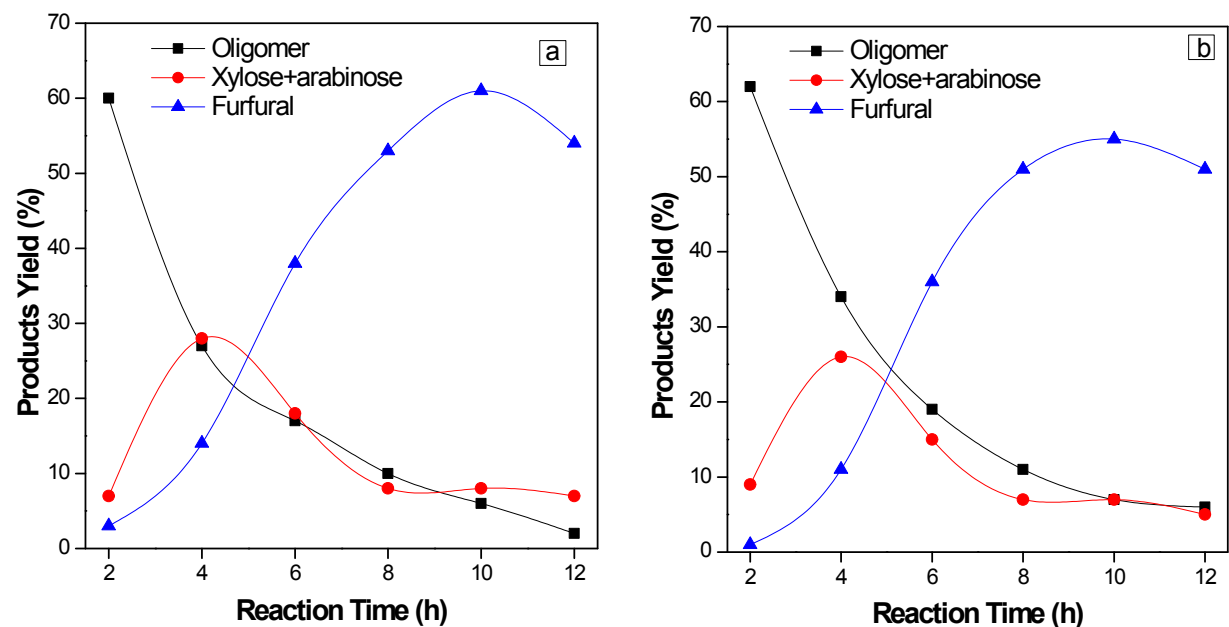

**Fig. S3a, b** Optimization of reaction time for one-pot hemicellulose conversion to furfural in presence of sol-gel (SG) synthesized catalysts; a.  $\text{WO}_3/\text{SiO}_2$ , b.  $\text{Ga}_2\text{O}_3/\text{SiO}_2$ . Reaction conditions: hemicellulose (0.3 g), catalyst (0.075 g), water + toluene = 60 mL (1:1 v/v), 443 K.

### **Optimization of catalyst amount**

Use of minimum quantity of catalyst can boost its applicability quotient. Consequently, a study with both  $\text{WO}_3/\text{SiO}_2$  (SG) and  $\text{Ga}_2\text{O}_3/\text{SiO}_2$  (SG) was undertaken at 443 K by altering the S/C ratio (*wt/wt*) from 1 to 8 keeping substrate amount constant (1*wt%*). Similar yield of furfural (55-61%) after 10 h reaction was detected with the S/C ratio maintained in the range of 1-4, but with the increase in ratio to 8, decrease in the yield (ca. 47%) with lower hemicellulose conversion (86%) was seen. This was quite obvious as insufficient amount of acid sites were present in the system to catalyze reactions. Hence, in next reactions, S/C ratio of 4 was fixed.

### **Optimization of substrate concentration**

Besides, lowering the catalyst quantity it is also beneficial if higher substrate amount can be used and hence reactions were conducted using 1, 5 and 10*wt%* hemicellulose concentration. The results indicate that with 1 and 5 *wt%* substrate concentrations similar furfural yields ( $\text{WO}_3/\text{SiO}_2$  (SG)=61±2%,  $\text{Ga}_2\text{O}_3/\text{SiO}_2$  (SG)=56±1%) can be achieved however, with the increase in concentration to 10*wt%*, lower yields ( $\text{WO}_3/\text{SiO}_2$  (SG)=45%,  $\text{Ga}_2\text{O}_3/\text{SiO}_2$  (SG)=40%) were obtained. The lower yield of furfural can be due to the occurrence of side reactions since concentrated solution of furfural and xylose is present. The similar phenomenon is explained in case of fructose dehydration reaction to yield HMF.<sup>6</sup>

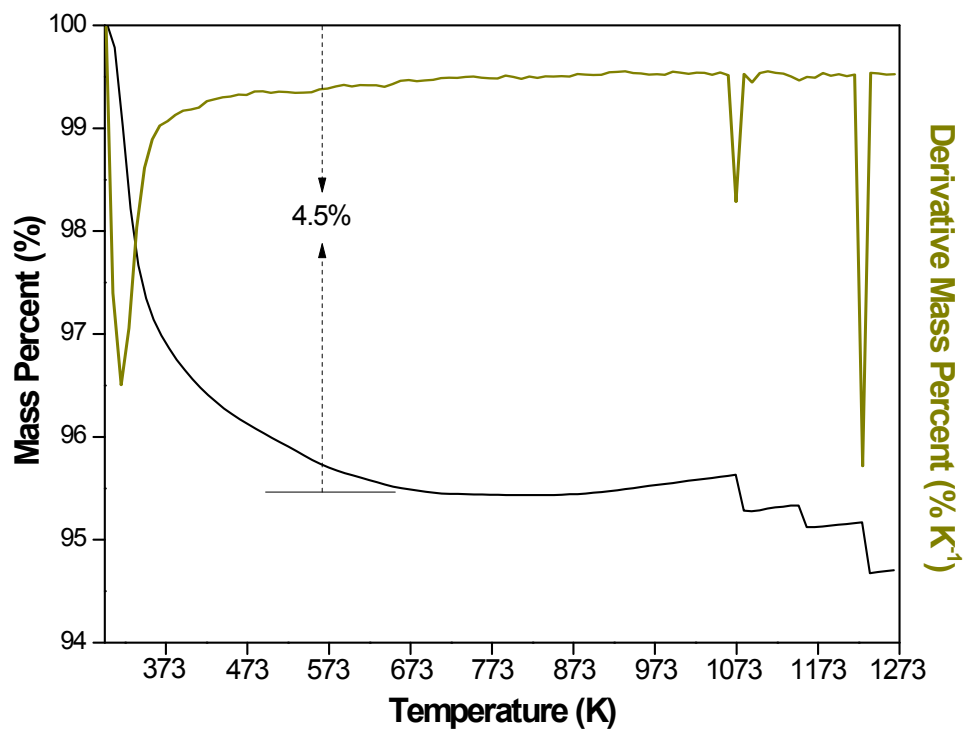

Fig. S4a TGA-DTG analysis for  $\text{WO}_3/\text{SiO}_2$  (SG).

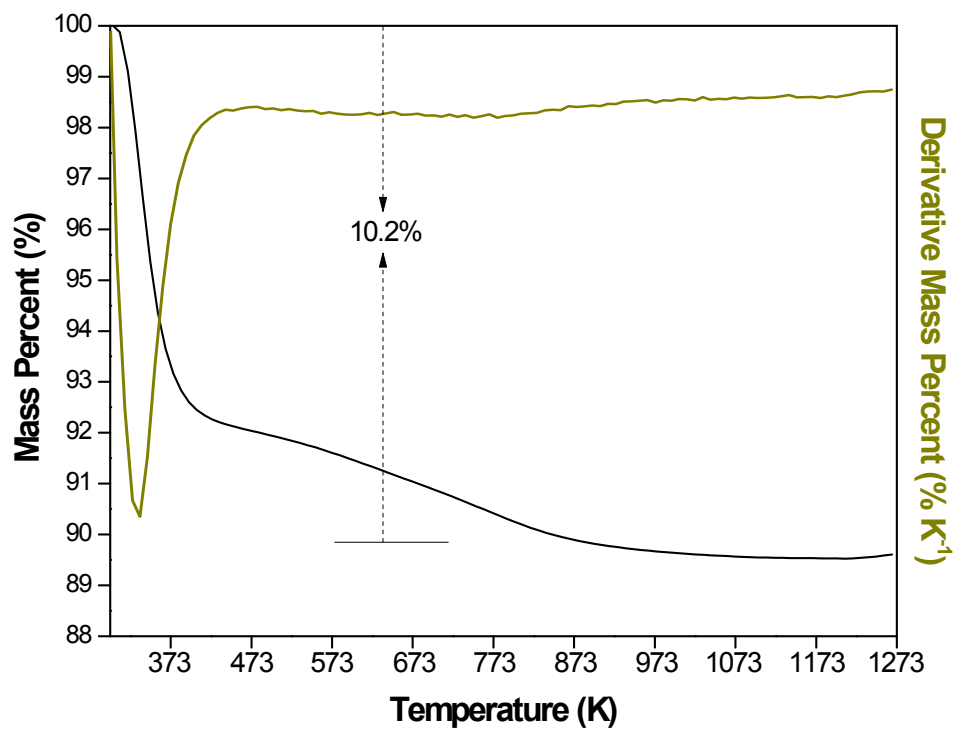

Fig. S4b TGA-DTG analysis for  $\text{Ga}_2\text{O}_3/\text{SiO}_2$  (SG).

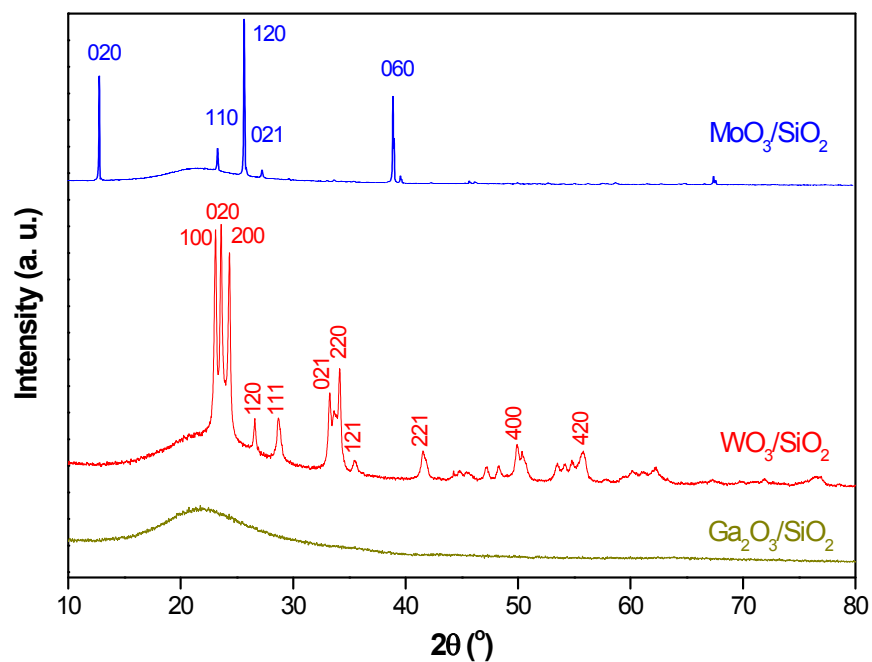

**Fig. S5** XRD patterns for silica supported tungsten, molybdenum and gallium oxide catalysts synthesized by wet-impregnation (WI) method.

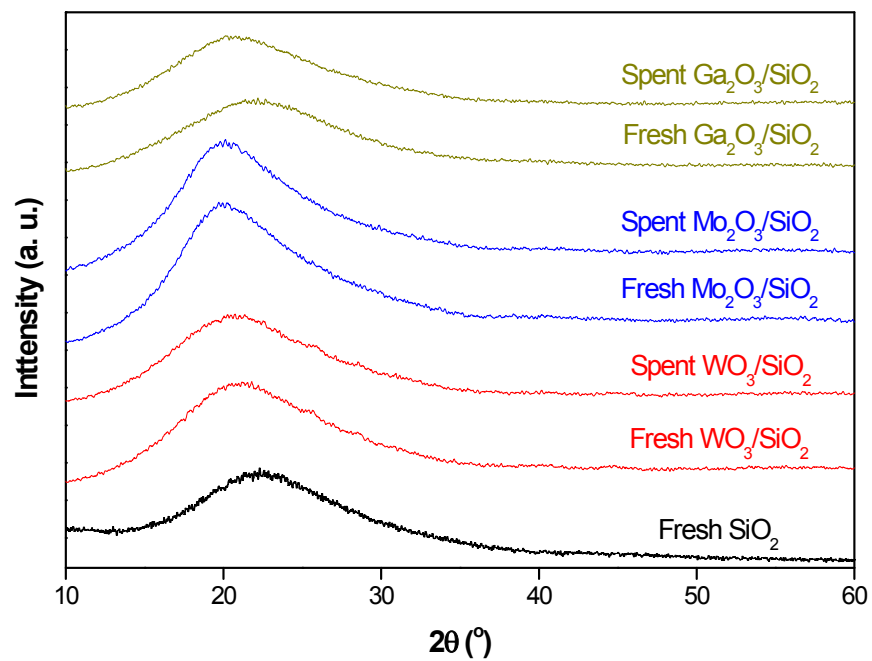

**Fig. S6** XRD patterns for silica supported tungsten, molybdenum and gallium oxide catalysts synthesized by sol-gel (SG) method.

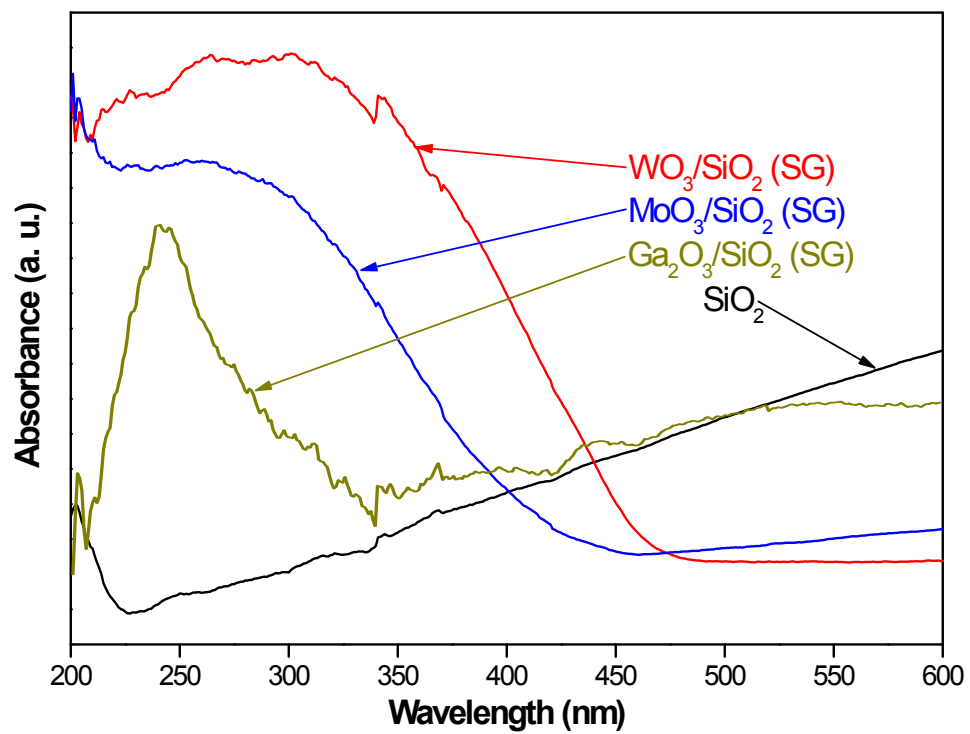

**Fig. S7** UV-Vis analysis of sol-gel (SG) synthesized silica supported tungsten, molybdenum and gallium oxide catalyst along with fumed silica.

## XRD analysis of ZrO<sub>2</sub> supported metal oxide catalysts

The below figure shows the XRD patterns for bulk structures of pure ZrO<sub>2</sub> and ZrO<sub>2</sub> supported metal oxides (SG). Pure ZrO<sub>2</sub> calcined at 773 K shows peaks for both the phases, monoclinic and tetragonal. The similar observation is noted in the literature.<sup>7</sup> The incorporation of molybdenum in ZrO<sub>2</sub> shows characteristic peaks for orthorhombic MoO<sub>3</sub> species with change in the ZrO<sub>2</sub> peak pattern. This is obvious since calcination at higher temperature (823 K) modifies tetragonal phase into monoclinic phase in ZrO<sub>2</sub>.<sup>7</sup> Moreover, it is also reported that peak due to Zr(MoO<sub>4</sub>)<sub>2</sub> species can be observed around same 2θ value (30.2°) where peak due to tetragonal phase of ZrO<sub>2</sub> is observed. However, in our case we rule out this possibility since we prepared the catalysts with 10wt% Mo loading and literature describe formation of Zr(MoO<sub>4</sub>)<sub>2</sub> at very high Mo loading (37wt%). XRD pattern for WO<sub>3</sub>/ZrO<sub>2</sub> catalyst shows typical peaks for orthorhombic WO<sub>3</sub> phase with tetragonal phase (major) in ZrO<sub>2</sub>. The similar observation was reported in the literature for WO<sub>3</sub>/ZrO<sub>2</sub>.<sup>8</sup> Absence of metal oxide peaks in Ga<sub>2</sub>O<sub>3</sub>/ZrO<sub>2</sub> might be due to very high dispersion and ZrO<sub>2</sub> mostly remain in tetragonal phase since calcination was done at 573 K.<sup>8</sup>

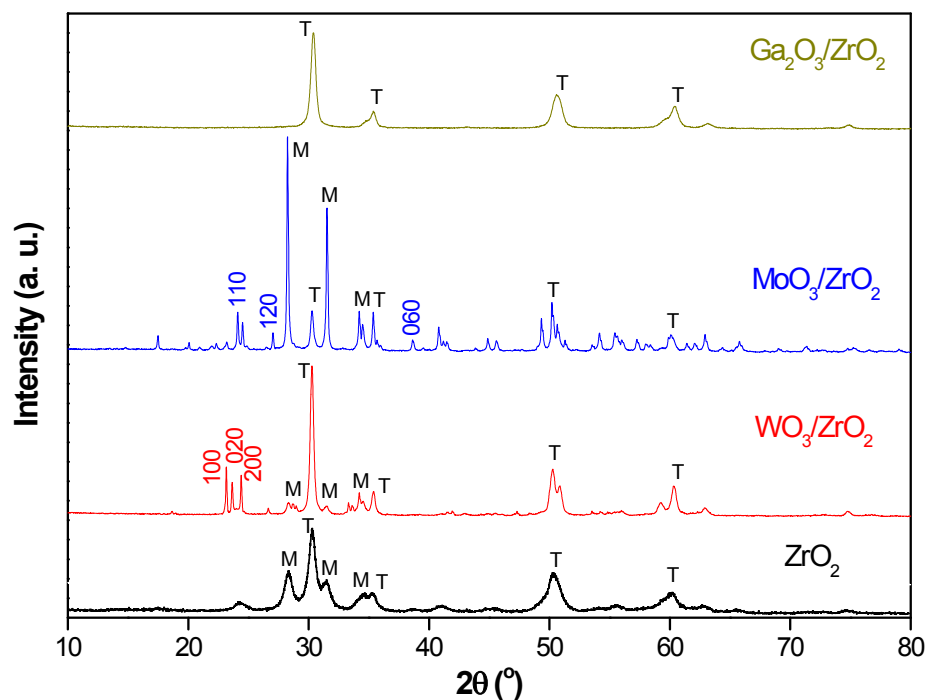

**Fig. S8** XRD patterns for zirconia supported tungsten, molybdenum and gallium oxide catalysts synthesized by sol-gel (SG) technique. ‘M’ indicates monoclinic ZrO<sub>2</sub> phase and ‘T’ indicates tetragonal ZrO<sub>2</sub> phase.

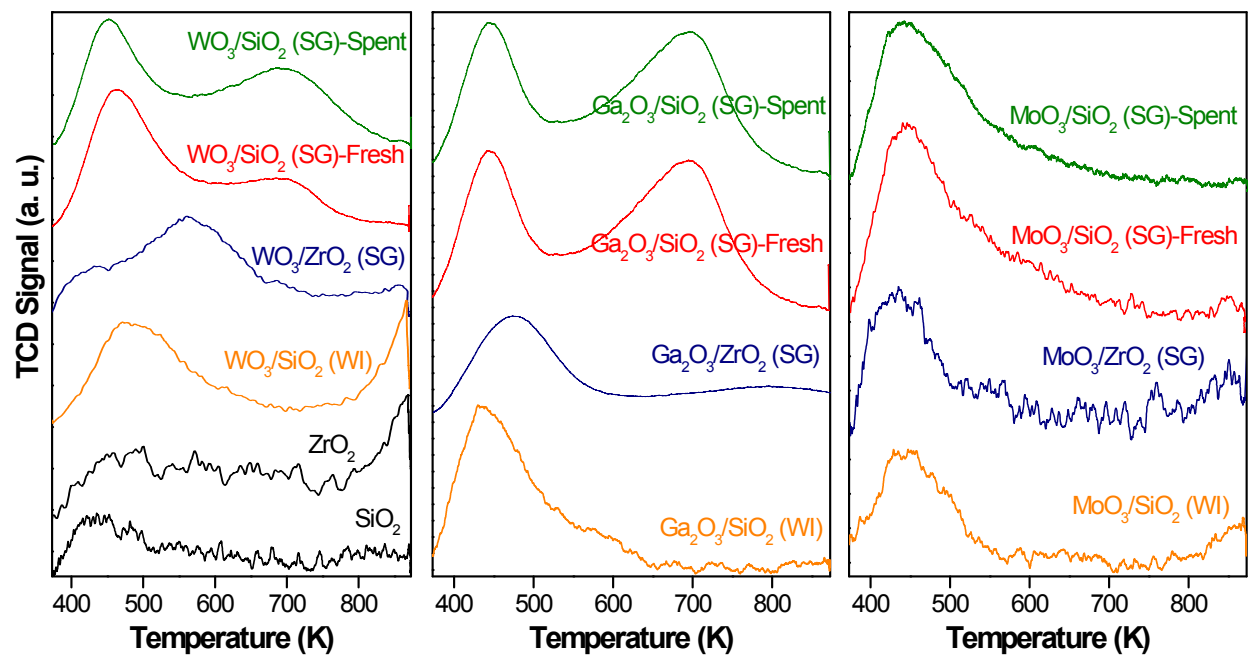

Fig. S9 TPD-NH<sub>3</sub> profile for all synthesized supported metal oxide.



## Hammett acidity calculation for sol-gel synthesized supported metal oxide catalysts

Determination of Hammett acidity was carried out with a basic indicator, *p*-nitro aniline (*p*-NA) according to previous report.<sup>9</sup> With the increase in acid scale in sample, the absorbance of the un-protonated form of basic indicator decreased, whereas the protonated form of indicator could not be observed because of its small molar absorptivity. In a typical procedure, 0.0025 g of catalyst was added to 10 mL standard *p*-NA solution in water (10 ppm, pK<sub>a</sub> = 0.99). Stirred the mixture for 0.5 h and filtered the solution through 0.22 μm syringe filter. Absorbance of filtrate was checked with UV-Vis spectrophotometer in the range of 200-600 nm. A maximum absorbance for all the samples was observed at 380 nm. Hammett acidity (*H*<sub>0</sub>) of samples was calculated according to the following equation.

$$H_0 = \text{pK}(\text{I})_{\text{aq}} + \log_{10} ([\text{I}] / [\text{IH}^+])$$

In this equation, pK(I)<sub>aq</sub> stands for the pK<sub>a</sub> value of standard indicator aqueous solution, [I] stands for percentage of un-protonated indicator and [IH<sup>+</sup>] stands for percentage for protonated indicator. Calculations of *H*<sub>0</sub> were shown in below table.

**Table S2** Determination of Hammett acidity in supported metal oxide catalysts

| Catalyst <sup>#</sup>                                  | A <sub>max</sub> | [I]% | [IH <sup>+</sup> ]% | <i>H</i> <sub>0</sub> |
|--------------------------------------------------------|------------------|------|---------------------|-----------------------|
| Blank                                                  | 1.105            | 100  | 0                   | -                     |
| Fresh WO <sub>3</sub> /SiO <sub>2</sub>                | 0.918            | 83.1 | 16.9                | 1.68                  |
| Spent WO <sub>3</sub> /SiO <sub>2</sub>                | 0.911            | 82.4 | 17.6                | 1.66                  |
| Fresh MoO <sub>3</sub> /SiO <sub>2</sub>               | 1.027            | 92.9 | 7.1                 | 2.11                  |
| Spent MoO <sub>3</sub> /SiO <sub>2</sub>               | 1.033            | 93.5 | 6.5                 | 2.15                  |
| Fresh Ga <sub>2</sub> O <sub>3</sub> /SiO <sub>2</sub> | 0.990            | 89.6 | 10.4                | 1.92                  |
| Spent Ga <sub>2</sub> O <sub>3</sub> /SiO <sub>2</sub> | 0.995            | 90.0 | 10.0                | 1.95                  |

<sup>#</sup>catalysts synthesized by sol-gel (SG) method.

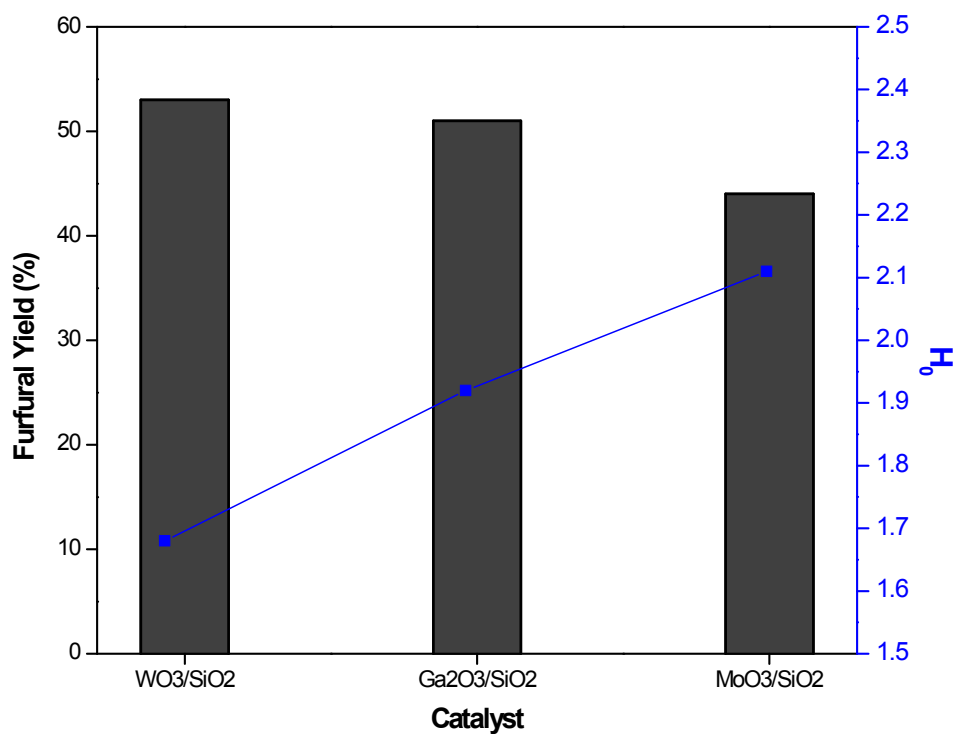

**Fig. S10** Correlation between furfural formation activity and acid strength of silica supported tungsten, molybdenum and gallium oxide catalysts synthesized by sol-gel (SG) method.

## References

- (1) Colque, S.; Payen, E.; Grange, P. *J. Mater. Chem.* **1994**, *4*, 1343.
- (2) Suzuki, K.; Hayakawa, T.; Shimizu, M.; Takehira, K. *Catal. Lett.* **1994**, *30*, 159.
- (3) Delgado, M. R.; Arean, C. O. *J. Mater. Sci. Lett.* **2003**, *22*, 783.
- (4) Li, L.; Yoshinaga, Y.; Okuhara, T. *Phys. Chem. Chem. Phys.* **1999**, *1*, 4913.
- (5) Cortes-Jacome, M.; Angeles-Chavez, C.; Bokhimi, X.; Toledo-Antonio, J. A. *J. Solid State Chem.* **2006**, *179*, 2663.
- (6) Bhaumik, P.; Dhepe, P. L. *RSC Adv.* **2013**, *3*, 17156.
- (7) Xie, S.; Chen, K.; Bell, A. T.; Iglesia, E. *J. Phys. Chem. B* **2000**, *104*, 10059.
- (8) Sohn, J. R.; Park, M. Y. *J. Ind. Eng. Chem.* **1998**, *4*, 84.
- (9) Wang, Y.; Gong, X.; Wang, Z.; Dai, L. *J. Mol. Catal. A: Chem.* **2010**, *322*, 7.
